# Supplementary material
Source: PubMed Central journal article supplement (PMC11071519)
Supplement: NIHMS1876387-supplement-Supp3.pdf [file NIHMS1876387-supplement-Supp3.pdf]

## Data Sharing Statement

Loftus. The Effect of Improving Basic Preventive Measures in the Perioperative Arena on Staphylococcus aureus Transmission and Surgical Site Infections. *JAMA Netw Open*. Published March 27, 2020. 10.1001/jamanetworkopen.2020.1934

### Data

**Data available:** Yes

**Data types:** Deidentified participant data, Data dictionary

**How to access data:** Accessed by request from statisticians  
Jeremiah Brown or Franklin Dexter

**When available:** With publication

### Supporting Documents

**Document types:** Statistical/analytic code

**How to access documents:** Accessed by request from statisticians  
Jeremiah Brown or Franklin Dexter

**When available:** With publication

### Additional Information

**Who can access the data:** Accessed by request from statisticians  
Jeremiah Brown or Franklin Dexter

**Types of analyses:** for any purpose

**Mechanisms of data availability:** with a signed data access agreement
